# Supplementary material for: Aedes mosquitoes acquire and transmit Zika virus by breeding in contaminated aquatic environments
Source: PubMed Central journal article supplement (PMC6430813; doi:10.1038/s41467-019-09256-0), 2019-03-22
Supplement: 41467_2019_9256_MOESM1_ESM.pdf [file 41467_2019_9256_MOESM1_ESM.pdf]

# Supplementary Information

***Aedes* mosquitoes acquire and transmit Zika virus by breeding in contaminated aquatic environments**  
**Du et al., 2019**

## Supplementary Information

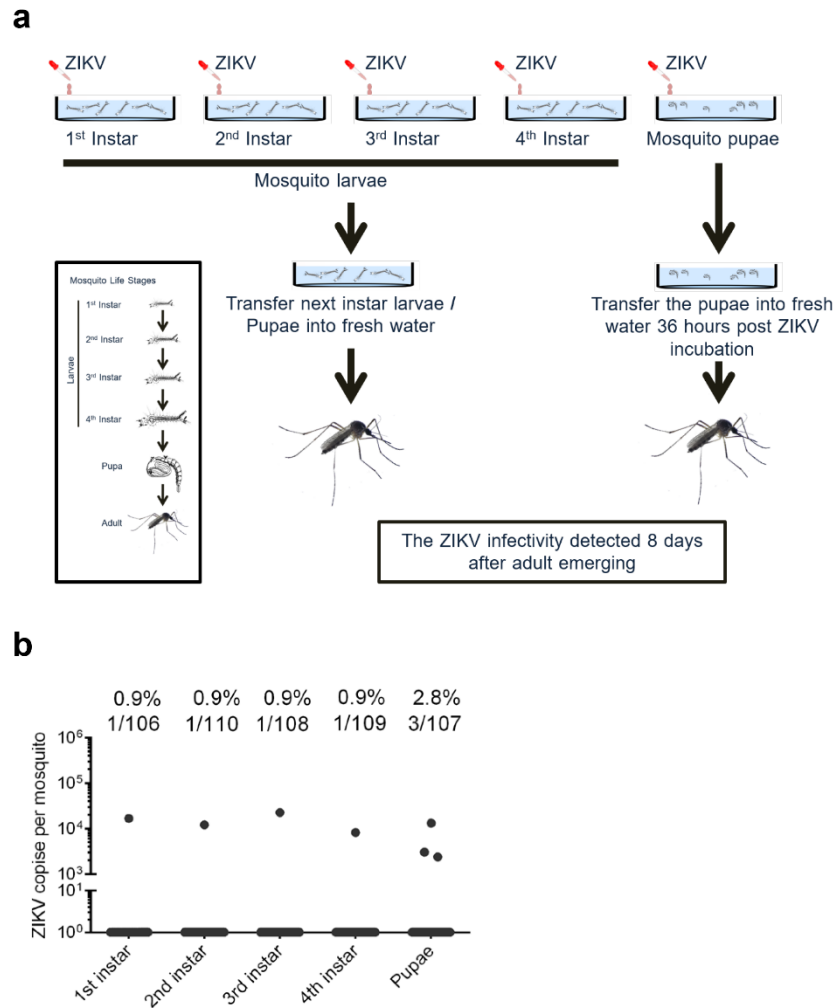

### Supplementary Fig. 1 Assessing ZIKV infection in mosquitoes breeding from the diluted ZIKV urine

**a** Schematic representation. The ZIKV urine (from Donor 3, final titer 20 pfu/ml) was used for *A. aegypti* Rockefeller strain larvae and pupae breeding. After development to the next stage, the larvae or pupae were then transferred to a new container with fresh water. The emerging adult mosquitoes were reared for an additional 8 days for ZIKV detection by RT-qPCR.

**b** ZIKV infection in mosquitoes breeding from diluted ZIKV urine. The emerging adults were reared for 8 days for ZIKV detection by RT-qPCR. The number of infected mosquitoes relative to the total number of mosquitoes is shown at the top of each column. One dot represents a mosquito. The percentages are represented as the ratios of mosquito infection. The data were pooled from 3 independent biological replicates.

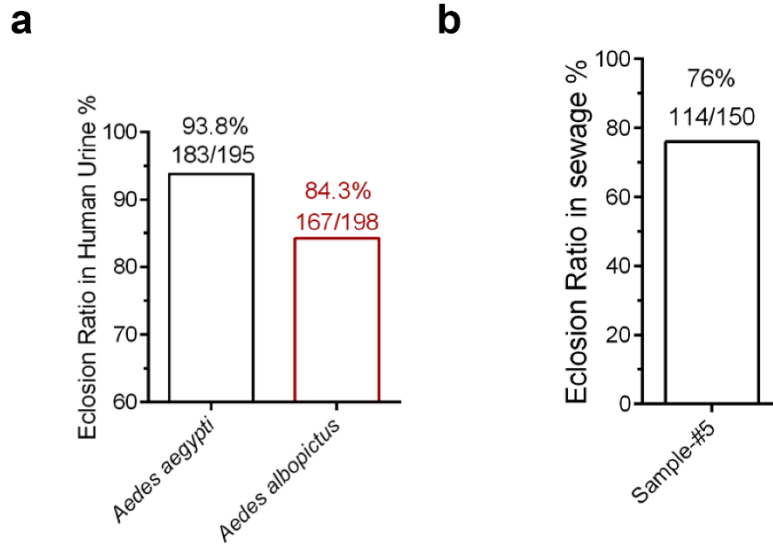

**Supplementary Fig. 2 Eclosion ratio of mosquito pupae in human urine and sewage sample.**

The freshly emerging pupae of various mosquito species were reared in human urine (*A. aegypti* Rockefeller strain and *A. albopictus* Jiangsu strain) (**a**) or sewage sample (*A. aegypti* Brazil Paraiba strain) (**b**). The eclosion ratio of mosquito pupae was calculated after all pupae eclosed or died. The number of adult mosquitoes relative to the total number of pupae is shown at the top of each column. The percentages are represented as the eclosion ratio of pupae.

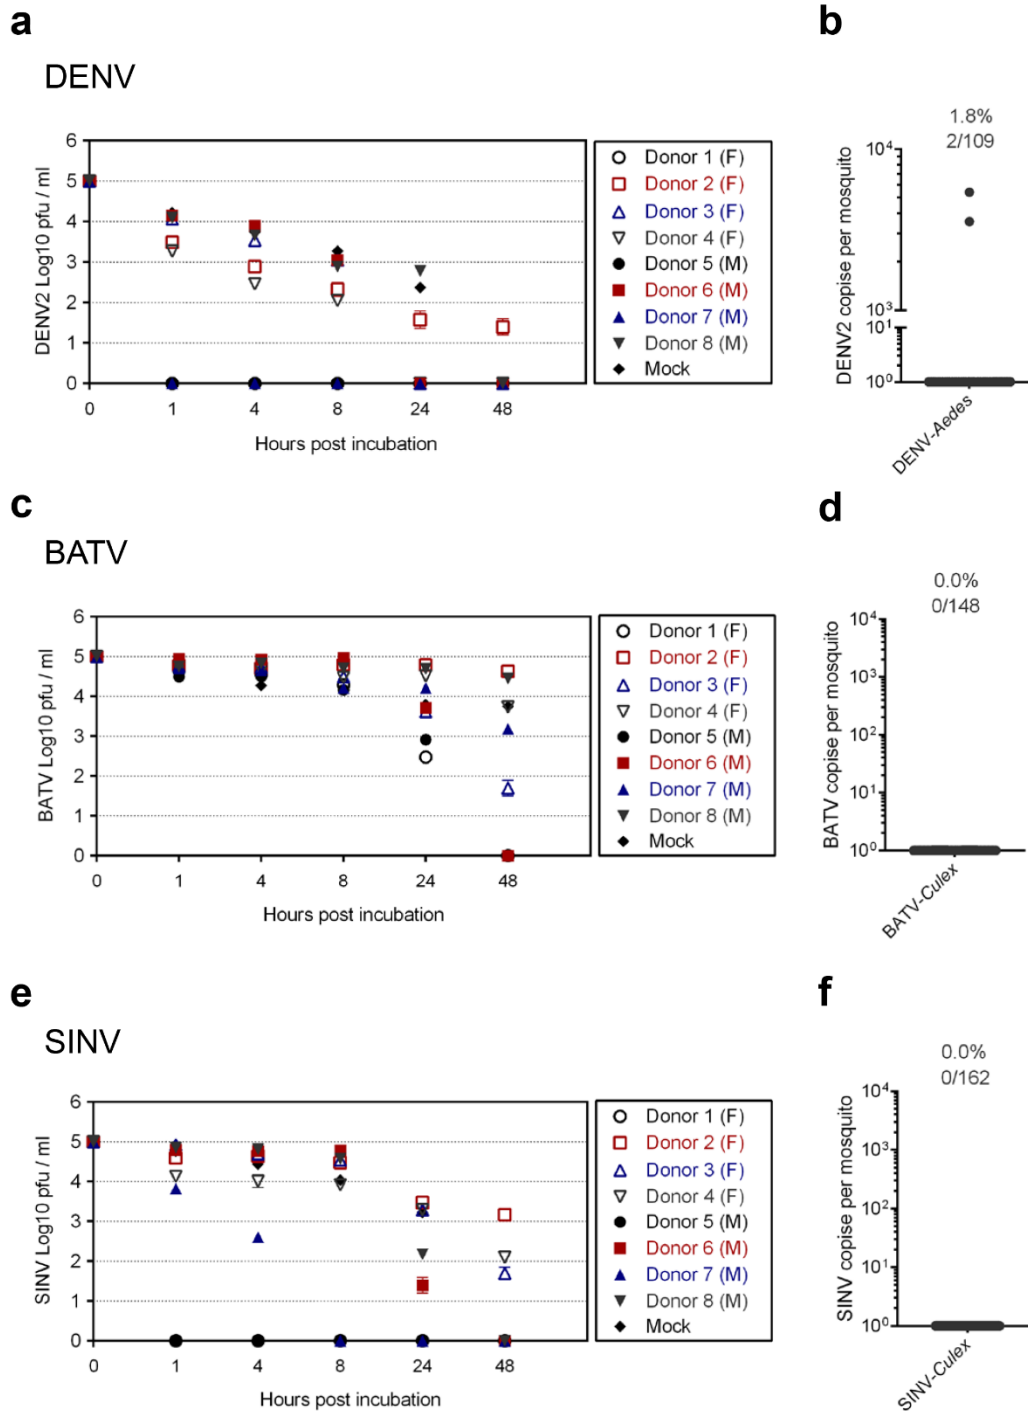

**Supplementary Fig. 3 Arboviral infection in mosquitoes breeding from viral urine.**

**a, c, e** Arboviral survivability in human urine. DENV2 (**a**), BATV (**c**) and SINV (**e**) were incubated with fresh human urine or PBS as control. The mixtures were then maintained at 37°C for a time course and subsequently subjected to a viral titration assay. The initial viral titer was  $1 \times 10^5$  pfu/ml. The data represent 4 biologically independent samples from 2 parallel experiments. Data are presented as the mean  $\pm$  S.E.M.

**b, d, f** Mosquito infection with various arboviruses. The pupae of the *A. aegypti* Rockefeller strain were reared in human urine (Donor 3) with DENV2 (**b**), while the pupae of *C. quinquefasciatus* Hainan strain were reared in the urine with BATV (**d**) or SINV (**f**). The final titer of each virus in the urine was  $1 \times 10^3$  pfu/ml. The emerging adults were reared for 8 days for virus detection by RT-qPCR. The number of infected mosquitoes relative to the total number of mosquitoes is shown at the top of each column. One dot represents a mosquito. The percentages are represented as the ratios of mosquito infection.

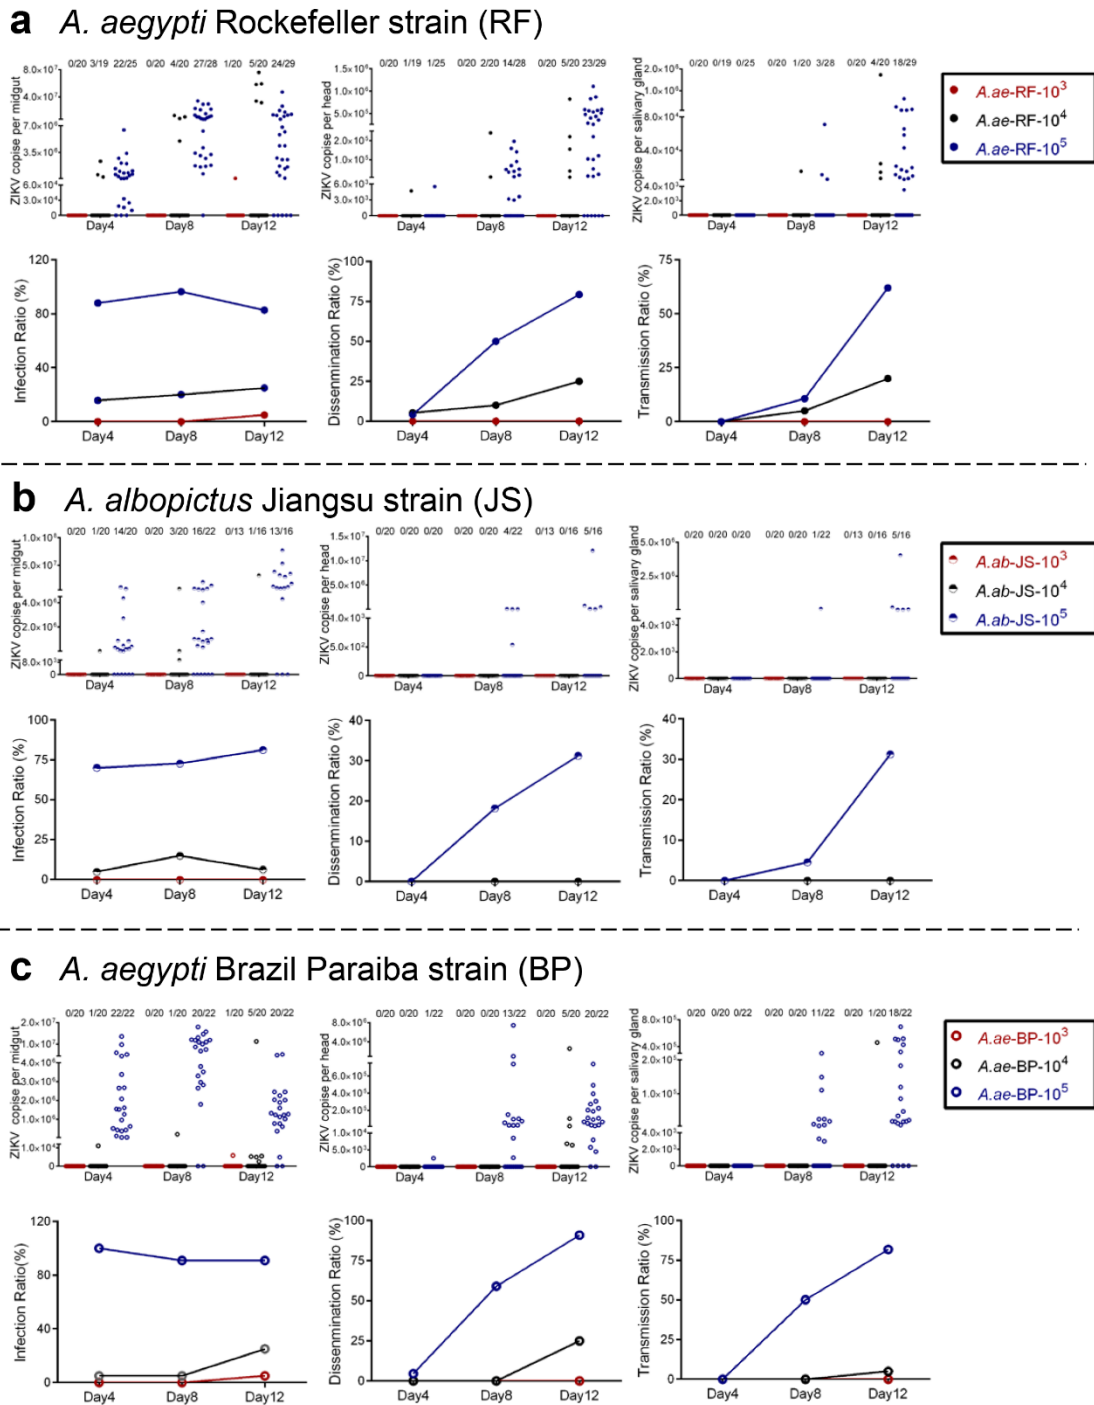

**Supplementary Fig. 4** Assessing the vector competence of different *Aedes* strains after feeding on a serial titration of ZIKV. The mosquitoes, including the *A. aegypti* Rockefeller strain (a), the *A. albopictus* Jiangsu strain (b) and the *A. aegypti* Brazil Paraiba strain (c) were fed by human blood (50% v/v) and a supernatant from ZIKV infected Vero cells (50% /v). The ZIKV load was determined in the midgut, the head and the salivary glands at a time course by Taqman qPCR, respectively. The infection, dissemination, and transmission rates of

these mosquitoes were subsequently calculated accordingly. The upper panels: The number of infected mosquitoes relative to the total number of mosquitoes is shown at the top of each column. One dot represents a mosquito. The lower panels: The data represented the percentage of mosquito infection.

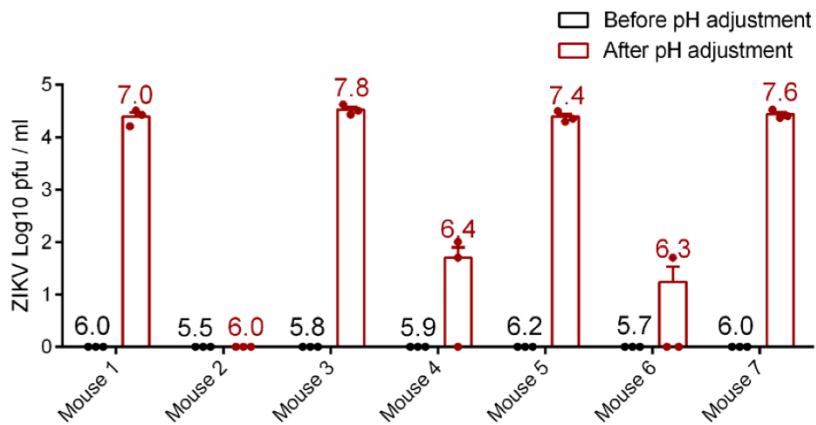

**Supplementary Fig. 5 Adjustment of the pH value regulated ZIKV survivability in mouse urine.**

The pH-manipulated urine samples were incubated with ZIKV supernatant from infected Vero cells (the initial titer  $1 \times 10^5$  pfu /ml) for 4 hours at  $37^\circ\text{C}$ . The pH value is showed at the top of each column. Subsequently, the ZIKV titer was measured by a plaque assay.  $n=3$  detection replicates. Data are presented as the mean  $\pm$  S.E.M.



**Supplementary Table 1. Literature for the *A. aegypti* and *A. albopictus* mosquitoes breeding in polluted water**

| Location    | Study summary                                                                                                                                                                                                                                                                                                            | Supplementary Reference |
|-------------|--------------------------------------------------------------------------------------------------------------------------------------------------------------------------------------------------------------------------------------------------------------------------------------------------------------------------|-------------------------|
| Brazil      | <i>A. aegypti</i> can adapt to new sites and lay eggs in polluted water, such as the raw sewage.                                                                                                                                                                                                                         | 1                       |
| Brazil      | The proportion of cesspits found with <i>A. aegypti</i> immature forms in the two surveyed localities were as follows: Espigão do Oeste, 50.0% and Jaru, 27.3%. Moreover, the average number of insects did not differ significantly in the sampled cesspits and common breeding sites.                                  | 2                       |
| West Indies | Significant numbers of <i>A. aegypti</i> bred in septic tanks and underground drains. The primary producers of female mosquitoes were drums (165 per day), buckets (99 per day), tanks (63 per day) and septic tanks (too numerous to count).                                                                            | 3                       |
| Puerto Rico | The number of adult <i>A. aegypti</i> emerging per day from septic tanks in each community was 3 to 9 times larger than those produced in surface containers.                                                                                                                                                            | 4                       |
| Puerto Rico | The <i>A. aegypti</i> larvae were present in sewage water and septic tanks (10.3 larvae per septic tank per day). The <i>A. aegypti</i> adults were recovered from 49% of the sampled tanks (8.7 adults per septic tank per day).                                                                                        | 5                       |
| Puerto Rico | Underground aquatic habitats (septic tanks) produced large numbers of <i>A. aegypti</i> (>18,000 <i>A. aegypti</i> adults per day).                                                                                                                                                                                      | 6                       |
| Mexico      | <i>A. aegypti</i> and <i>C. Quinquefasciatus</i> were found breeding with notable frequency in all the different types of storm sewers (26.6% and 23.9%, respectively).                                                                                                                                                  | 7                       |
| Malaysia    | Seventy-two (55.4 percent) of the 130 septic tanks (contact filter-bed with pump sump and pump motor type) inspected had <i>A. albopictus</i> breeding.                                                                                                                                                                  | 8                       |
| Malaysia    | The adaptation to poor and polluted water quality in dengue vectors mosquito larval habitat was related to pollutant from domestic and industrial exposure. Most of <i>A. albopictus</i> mosquitos preferred to breed in polluted water.                                                                                 | 9                       |
| India       | For both <i>A. aegypti</i> and <i>A. albopictus</i> , sewage drains were equally congenial habitat as were plastic, porcelain and earthen habitats.                                                                                                                                                                      | 10                      |
| Indonesia   | <i>A.aegypti</i> mosquitoes bred well in polluted water in direct contact with the ground.                                                                                                                                                                                                                               | 11                      |
| Sri Lanka   | Both <i>A. aegypti</i> and <i>A. albopictus</i> preferred to breed in waste water with low dissolved oxygen levels and had a significantly high oviposition rate.                                                                                                                                                        | 12                      |
| Nigeria     | <i>C. quinquefasciatus</i> , <i>C. cinereus</i> and <i>A. aegypti</i> have been commonly found breeding in ammonia and nitrate-rich waters of latrines and septic tanks. These mosquitoes are able to breed in highly polluted water of septic tanks during the harsh dry months when most surface water bodies are dry. | 13                      |
| Pakistan    | Among 133 samples collected in wastewater irrigation system, 17.3% of the samples were positive for <i>Anopheles</i> larvae, 12.0% for <i>Culex</i> and 15.0% for <i>Aedes</i> .                                                                                                                                         | 14                      |

## Supplementary Table 2. Sewage samples information

| Sample                    | Sample-#1 | Sample-#2 | Sample-#3 | Sample-#4 | Sample-#5 | Sample-#6 | Sample-#7 | Sample-#8 | Sample-#9 | Sample-#10 |
|---------------------------|-----------|-----------|-----------|-----------|-----------|-----------|-----------|-----------|-----------|------------|
| pH                        | 8.35      | 7.54      | 7.45      | 7.88      | 7.62      | 7.51      | 7.9       | 7.98      | 7.73      | 7.56       |
| COD (mg/L)                | 80        | 172       | 232       | 349       | 462       | 780       | 1060      | 1285      | 1700      | 2300       |
| NH <sub>3</sub> -N (mg/L) | 25        | 34        | 43        | 110       | 85        | 140       | 330       | 235       | 340       | 430        |

**Supplementary Table 3. Sewage information of America**

| <b>Location</b>             | <b>Source</b>   | <b>pH</b>   | <b>COD (mg/L)</b> | <b>NH<sub>3</sub>-N (mg/L)</b> | <b>Supplementary Reference</b> |
|-----------------------------|-----------------|-------------|-------------------|--------------------------------|--------------------------------|
| Curitiba-south-Brazil       | Raw sewage      | 7.09 ±0.12  | 348.4±119.8       | 38 ±8.5                        | 1                              |
| Sao Paulo- Brazil           | Sewage          | ND          | 274-588           | ND                             | 15.                            |
| Yamoussoukro-Coate d'Ivoire | Septic tank     | 7.0 ± 0.1   | 118.0±30.2        | 13.5 ±8.5                      | 16                             |
| Sao Paulo- Brazil           | Raw wastewater  | ND          | 823               | 40.4                           | 17                             |
| Brazil                      | Domestic sewage | 6.7-8       | 450-800           | 20-35                          | 18                             |
| Brazil                      | Domestic sewage | 6.95 ±0.34  | 536±123.3         | 59.2 ±19.5                     | 19                             |
| Port-au-Prince Haiti        | Flush toilet    | 7.20 ± 0.06 | 1090 ± 90         | 164 ± 28                       | 20.                            |
| Brazil                      | Raw sewage      | 7.13-7.17   | 213-1323          | 16-154                         | 21.                            |
| Mexico                      | septic tank     | 7.9-8.5     | 740 ± 236         | ND                             | 22.                            |

Supplementary Table 4. Human urine information

| No. | Gender | Age | pH Value | Specific Gravity | Clarity | Color        |
|-----|--------|-----|----------|------------------|---------|--------------|
| 1   | Female | 28  | 5.38     | 1.017            | Clean   | Yellow       |
| 2   | Female | 24  | 5.4      | 1.013            | Clean   | Yellow       |
| 3   | Female | 49  | 5.47     | 1.012            | Clean   | Light yellow |
| 4   | Female | 11  | 5.76     | 1.009            | Clean   | Light yellow |
| 5   | Female | 63  | 5.87     | 1.012            | Clean   | Light yellow |
| 6   | Female | 24  | 5.94     | 1.006            | Clean   | Light yellow |
| 7   | Female | 51  | 6.04     | 1.005            | Clean   | Light yellow |
| 8   | Female | 64  | 6.06     | 1                | Clean   | Colorless    |
| 9   | Female | 47  | 6.2      | 1.005            | Clean   | Light yellow |
| 10  | Female | 64  | 6.21     | 1.004            | Clean   | Light yellow |
| 11  | Female | 77  | 6.38     | 1.007            | Clean   | Light yellow |
| 12  | Female | 31  | 6.39     | 1                | Clean   | Colorless    |
| 13  | Female | 24  | 6.6      | 1.017            | Clean   | Yellow       |
| 14  | Female | 30  | 6.61     | 1.009            | Clean   | Light yellow |
| 15  | Female | 11  | 6.66     | 1.004            | Clean   | Light yellow |
| 16  | Female | 79  | 6.67     | 1.003            | Clean   | Light yellow |
| 17  | Female | 39  | 6.74     | 1                | Clean   | Colorless    |
| 18  | Female | 23  | 6.81     | 1                | Clean   | Colorless    |
| 19  | Female | 60  | 6.84     | 1.011            | Clean   | Light yellow |
| 20  | Female | 18  | 6.89     | 1.012            | Clean   | Light yellow |
| 21  | Female | 25  | 6.9      | 1                | Clean   | Colorless    |
| 22  | Female | 44  | 6.92     | 1.01             | Clean   | Light yellow |
| 23  | Female | 22  | 7.03     | 1.001            | Clean   | Colorless    |
| 24  | Female | 39  | 7.18     | 1                | Clean   | Colorless    |
| 25  | Female | 63  | 7.18     | 1.003            | Clean   | Colorless    |
| 26  | Female | 26  | 7.19     | 1.005            | Clean   | Light yellow |
| 27  | Female | 16  | 7.39     | 1                | Clean   | Colorless    |
| 28  | Female | 73  | 7.48     | 1                | Clean   | Colorless    |
| 29  | Male   | 36  | 5.29     | 1.02             | Clean   | Yellow       |
| 30  | Male   | 27  | 5.32     | 1.021            | Clean   | Yellow       |
| 31  | Male   | 44  | 5.35     | 1.004            | Clean   | Light yellow |
| 32  | Male   | 65  | 5.4      | 1.019            | Clean   | Yellow       |
| 33  | Male   | 72  | 5.41     | 1.007            | Clean   | Light yellow |
| 34  | Male   | 56  | 5.44     | 1.016            | Clean   | Light yellow |
| 35  | Male   | 26  | 5.49     | 1.025            | Clean   | Yellow       |
| 36  | Male   | 29  | 5.61     | 1.012            | Clean   | Light yellow |
| 37  | Male   | 9   | 5.63     | 1.02             | Clean   | Light yellow |
| 38  | Male   | 26  | 5.69     | 1.025            | Clean   | Yellow       |
| 39  | Male   | 29  | 5.71     | 1.029            | Clean   | Yellow       |
| 40  | Male   | 26  | 5.72     | 1.019            | Clean   | Light yellow |
| 41  | Male   | 25  | 5.78     | 1.023            | Clean   | Yellow       |
| 42  | Male   | 42  | 5.8      | 1.013            | Clean   | Light yellow |
| 43  | Male   | 24  | 5.84     | 1.015            | Clean   | Yellow       |
| 44  | Male   | 82  | 5.84     | 1.011            | Clean   | Yellow       |
| 45  | Male   | 82  | 5.84     | 1.02             | Clean   | Yellow       |
| 46  | Male   | 28  | 5.87     | 1.026            | Clean   | Yellow       |
| 47  | Male   | 31  | 5.92     | 1.017            | Clean   | Yellow       |
| 48  | Male   | 34  | 6.05     | 1.015            | Clean   | Light yellow |
| 49  | Male   | 30  | 6.1      | 1.016            | Clean   | Light yellow |
| 50  | Male   | 32  | 6.1      | 1.019            | Clean   | Light yellow |
| 51  | Male   | 32  | 6.1      | 1.02             | Clean   | Yellow       |
| 52  | Male   | 52  | 6.12     | 1                | Clean   | Light yellow |
| 53  | Male   | 30  | 6.23     | 1.018            | Clean   | Light yellow |
| 54  | Male   | 34  | 6.25     | 1.017            | Clean   | Light yellow |
| 55  | Male   | 20  | 6.27     | 1.024            | Clean   | Light yellow |
| 56  | Male   | 26  | 6.27     | 1.011            | Clean   | Light yellow |
| 57  | Male   | 55  | 6.36     | 1.007            | Clean   | Light yellow |
| 58  | Male   | 26  | 6.37     | 1.004            | Clean   | Colorless    |
| 59  | Male   | 61  | 6.41     | 1.023            | Clean   | Yellow       |
| 60  | Male   | 44  | 6.47     | 1                | Clean   | Light yellow |
| 61  | Male   | 68  | 6.49     | 1                | Clean   | Colorless    |
| 62  | Male   | 25  | 6.51     | 1.013            | Clean   | Light yellow |
| 63  | Male   | 34  | 6.55     | 1.021            | Clean   | Yellow       |
| 64  | Male   | 54  | 6.56     | 1.004            | Clean   | Colorless    |
| 65  | Male   | 21  | 6.6      | 1.012            | Clean   | Light yellow |
| 66  | Male   | 24  | 6.6      | 1.002            | Clean   | Light yellow |
| 67  | Male   | 43  | 6.72     | 1                | Clean   | Colorless    |
| 68  | Male   | 43  | 6.75     | 1.012            | Clean   | Light yellow |
| 69  | Male   | 49  | 6.75     | 1                | Clean   | Light yellow |
| 70  | Male   | 21  | 6.8      | 1.004            | Clean   | Light yellow |
| 71  | Male   | 27  | 6.82     | 1                | Clean   | Colorless    |
| 72  | Male   | 34  | 6.82     | 1                | Clean   | Colorless    |
| 73  | Male   | 19  | 6.86     | 1                | Clean   | Light yellow |
| 74  | Male   | 25  | 6.88     | 1                | Clean   | Colorless    |
| 75  | Male   | 22  | 7.05     | 1.007            | Clean   | Light yellow |
| 76  | Male   | 26  | 7.23     | 1.014            | Clean   | Light yellow |
| 77  | Male   | 25  | 7.27     | 1.004            | Clean   | Light yellow |
| 78  | Male   | 11  | 7.28     | 1                | Clean   | Light yellow |
| 79  | Male   | 22  | 7.29     | 1                | Clean   | Colorless    |
| 80  | Male   | 15  | 7.42     | 1.003            | Clean   | Colorless    |
| 81  | Male   | 77  | 7.65     | 1                | Clean   | Colorless    |

**Supplementary Table 5. Primers and probes for PCR**

| <b>The primers for virus sequencing PCR</b> | <b>Upper primer</b>        | <b>Lower primer</b>       |                                         |
|---------------------------------------------|----------------------------|---------------------------|-----------------------------------------|
| <i>ZIKV fragment gene</i>                   | AGGACAGGCCTTGAC            | TGGCCATTACATGT            |                                         |
| <b>The primers for Taqman RT-qPCR</b>       | <b>Upper primer</b>        | <b>Lower primer</b>       | <b>Probe (for Taqman qPCR)</b>          |
| <i>ZIKV Envelope gene</i>                   | CCGCTGCCCAACACAAG          | CCACTAACGTTCTTTGCAGACAT   | FAM-AGCCTACCTTGACAAGCARTCAGACTCAA-TAMRA |
| <i>DENV2 Envelope gene</i>                  | CATTCCAAGTGAGAATCTCTTTGTCA | CAGATCTCTGATGAATAACCAACG  | FAM-ATGCTGAAACGCGAGAGAAAACCGC-TAMRA     |
| <b>The primers for SYBR RT-qPCR</b>         | <b>Upper primer</b>        | <b>Lower primer</b>       |                                         |
| <i>BATV S gene</i>                          | CAGTCCAGACGATGGTCTTACC     | GGTCACTCACTTCAGAATCTTCTCA |                                         |
| <i>SINV Envelope1 gene</i>                  | CGGCTATGGCAGGTTGTA         | CGCGCTCAAGGACTTTTTC       |                                         |

## Supplementary References

1. Chitolina, R. F., Anjos, F. A., Lima, T. S., Castro, E. A. & Costa-Ribeiro, M. Raw sewage as breeding site to *Aedes* (Stegomyia) *aegypti* (Diptera, culicidae). *Acta Trop.* **164**, 290-296 (2016).
2. Herman Soares Gil, L. *et al.* Rudimentary cesspits as breeding sites for *Aedes aegypti* in urban areas of Northern Brazil. *Communication* **6**, 73-80 (2015).
3. Chadee, D. D. & Martinez, R. *Aedes aegypti* (L.) in Latin American and Caribbean region: With growing evidence for vector adaptation to climate change? *Acta Trop.* **156**, 137-143 (2016).
4. Mackay, A. J., Amador, M., Diaz, A., Smith, J. & Barrera, R. Dynamics of *Aedes aegypti* and *Culex quinquefasciatus* in septic tanks. *J. Am. Mosq. Control Assoc.* **25**, 409-416 (2009).
5. Burke, R., Barrera, R., Lewis, M., Kluchinsky, T. & Claborn, D. Septic tanks as larval habitats for the mosquitoes *Aedes aegypti* and *Culex quinquefasciatus* in Playa-Playita, Puerto Rico. *Med. Vet. Entomol.* **24**, 117-123 (2010).
6. Barrera, R. *et al.* Unusual productivity of *Aedes aegypti* in septic tanks and its implications for dengue control. *Med. Vet. Entomol.* **22**, 62-69 (2008).
7. Manrique-Saide, P. *et al.* Storm sewers as larval habitats for *Aedes aegypti* and *Culex spp.* in a neighborhood of Merida, Mexico. *J. Am. Mosq. Control Assoc.* **28**, 255-257 (2012).
8. Lam, W. K. & Dharmaraj, D. A survey on mosquitoes breeding in septic tanks in several residential areas around Ipoh municipality. *Med. J. Malaysia* **37**, 114-123 (1982).
9. Che Dom, N., Madzlan, F., Hasnan, A. & Misran, N. Water quality characteristics of dengue vectors breeding containers. *Int. J. Mosq. Res.* **25**, 25-29 (2016).
10. Banerjee, S. *et al.* Pupal productivity & nutrient reserves of *Aedes* mosquitoes breeding in sewage drains & other habitats of Kolkata, India: Implications for habitat expansion & vector management. *Indian J. Med. Res.* **142 Suppl**, S87-S94 (2015).
11. Utomo, S. W. & Triwibowo, G. A. *Aedes aegypti* Mosquito Breeding in Various Water Media. *Asian Journal of Applied Sciences* **2**, 481-487 (2016).
12. Gunathilaka, N., Ranathunge, T., Udayanga, L., Wijegunawardena, A. & Abeyewickreme, W. Oviposition preferences of dengue vectors; *Aedes aegypti* and *Aedes albopictus* in Sri Lanka

- under laboratory settings. *Bull. Entomol. Res.* **108**, 442-450 (2018).
13. Nwoke, B. E., Nduka, F. O., Okereke, O. M. & Ehighibe, O. C. Sustainable urban development and human health: septic tank as a major breeding habitat of mosquito vectors of human diseases in south-eastern Nigeria. *Appl. Parasitol.* **34**, 1-10 (1993).
  14. Mukhtar, M. *et al.* Role of wastewater irrigation in mosquito breeding in south Punjab, Pakistan. *Southeast Asian J. Trop. Med. Public Health* **34**, 72-80 (2003).
  15. Marguti, A. L., Ferreira, F. S. & Piveli, R. P. Full-scale effects of addition of sludge from water treatment stations into processes of sewage treatment by conventional activated sludge. *J. Environ. Manage.* **215**, 283-293 (2018).
  16. Kouame, P. K. *et al.* Ecohealth approach to urban waste management: exposure to environmental pollutants and health risks in Yamoussoukro, Cote d'Ivoire. *Int. J. Environ. Res. Public Health* **11**, 10292-10309 (2014).
  17. Harada, H., Dong, N. T. & Matsui, S. A measure for provisional-and-urgent sanitary improvement in developing countries: septic-tank performance improvement. *Water Sci. Technol.* **58**, 1305-1311 (2008).
  18. Von Sperling, M. & Chernicharo, C. A. L. *Biological Wastewater Treatment in Warm Climate Regions*. IWA Publishing, London, UK (2005).
  19. de Sa, S. A., Marques, M., Severo, R. G. & Da, C. R. O. Engineered ecosystem for on-site wastewater treatment in tropical areas. *Water Sci. Technol.* **66**, 2131-2137 (2012).
  20. Lansing, S., Maile-Moskowitz, A. & Eaton, A. Waste treatment and energy production from small-scale wastewater digesters. *Bioresour. Technol.* **245**, 801-809 (2017).
  21. Beserra, E. B., Fernandes, C. R., Sousa, J. T., Freitas, E. M. & Santos, K. D. The effect of water quality in the life cycle and in the attraction for the egg oviposition of *Aedes aegypti* (L.) (Diptera: Culicidae). *Neotrop. Entomol.* **39**, 1016-1023 (2010).
  22. Santiago-Diaz, A. L., Garcia-Albortante, J. & Salazar-Pelaez, M. L. UASB-septic tank as an alternative for decentralized wastewater treatment in Mexico. *Environ. Technol.* 1-13 (2018).
